# Supplementary material for: The Chinese import ban and its impact on global plastic waste trade
Source: PubMed Central journal article supplement — Sci Adv. 2018 Jun 20;4(6):eaat0131. doi: 10.1126/sciadv.aat0131 (PMC6010324; doi:10.1126/sciadv.aat0131), 2018-06-20
Supplement: aat0131_SM.pdf [file aat0131_SM.pdf]

## Supplementary Materials for

### The Chinese import ban and its impact on global plastic waste trade

Amy L. Brooks, Shunli Wang, Jenna R. Jambeck

Published 20 June 2018, *Sci. Adv.* **4**, eaat0131 (2018)

DOI: 10.1126/sciadv.aat0131

#### The PDF file includes:

- Supplementary Text
- fig. S1. Linear fit of all historical cumulative Chinese imports of plastic waste ( $R^2 = 0.89$ ) (9–12).
- fig. S2. Polynomial fit for historical cumulative Chinese imports of plastic waste ( $R^2 = 1.0$ ) (9–12).
- fig. S3. Linear fit for the last 10 years of cumulative Chinese imports of plastic waste ( $R^2 = 1.0$ ) (9–12).
- fig. S4. Best-fit regression analysis for future plastic waste imports (9–12).
- fig. S5. Top five importers to China in 2016 and top five export destinations for the top five historical exporters (13, 24–26).
- fig. S6. Comparison of cumulative import and export quantities of plastic waste (MT) from 1988 to 2016 for each plastic waste polymer.
- fig. S7. Annual Chinese imports of each plastic waste polymer from 1992 to 2016.
- fig. S8. Destination countries of U.S. exports of plastic waste in 2016 and cumulative plastic waste export tonnage (in million MT) in 1988–2016.
- fig. S9. Destination countries of Japanese exports of plastic waste in 2016 and cumulative plastic waste export tonnage (in million MT) in 1988–2016.
- fig. S10. Destination countries of German exports of plastic waste in 2016 and cumulative plastic waste export tonnage (in million MT) in 1988–2016.
- fig. S11. Destination countries of Mexican exports of plastic waste in 2016 and cumulative plastic waste export tonnage (in million MT) in 1988–2016.
- fig. S12. Destination countries of UK exports of plastic waste in 2016 and cumulative plastic waste export tonnage (in million MT) in 1988–2016.
- table S1. Ranking of World Bank economic groups based on cumulative exports and imports plastic waste (in MT) from 1988 to 2016 (9–12).

- table S2. Ranking of World Bank regional groups based on cumulative exports and imports of plastic waste (MT) from 1988 to 2016 (9–12).
- table S3. Ranking of countries based on cumulative exports and imports of each plastic waste polymer classification from 1988 to 2016 (9–12).
- table S4. Estimated percentage of imported plastic waste to be managed in China from 2010 to 2016 (4, 9–12, 14).
- table S5. Projected displaced plastic waste based on 100, 75, and 50% restriction scenarios for Chinese imports of plastic waste after the implementation of the new Chinese import ban policy.
- table S6. Ranking of top countries that exported plastic waste to China in 2016 (MT) (13).

**Other Supplementary Material for this manuscript includes the following:**

(available at [advances.sciencemag.org/cgi/content/full/4/6/eaat0131/DC1](https://advances.sciencemag.org/cgi/content/full/4/6/eaat0131/DC1))

- database S1. Trade Data Compilation Framework (Excel file).

## **Supplementary Text**

Along with advances in engineering and material separation technology, and in order to increase participation in recycling, the concept of “single stream” recycling was introduced. Citizens put all recyclable items into one single recycle bin (without source separation) and the materials go to a Materials Recovery Facility (MRF) to be separated out through both mechanical and manual means. Separated materials are baled and sold as commodities. While switching to single stream did increase the quantity of materials collected from citizens, it also resulted in two things 1) more residuals and non-recyclable materials going to MRFs and 2) dirtier commodity streams coming from MRFs. Both results have impacted the bottom line of recycling all over the world.

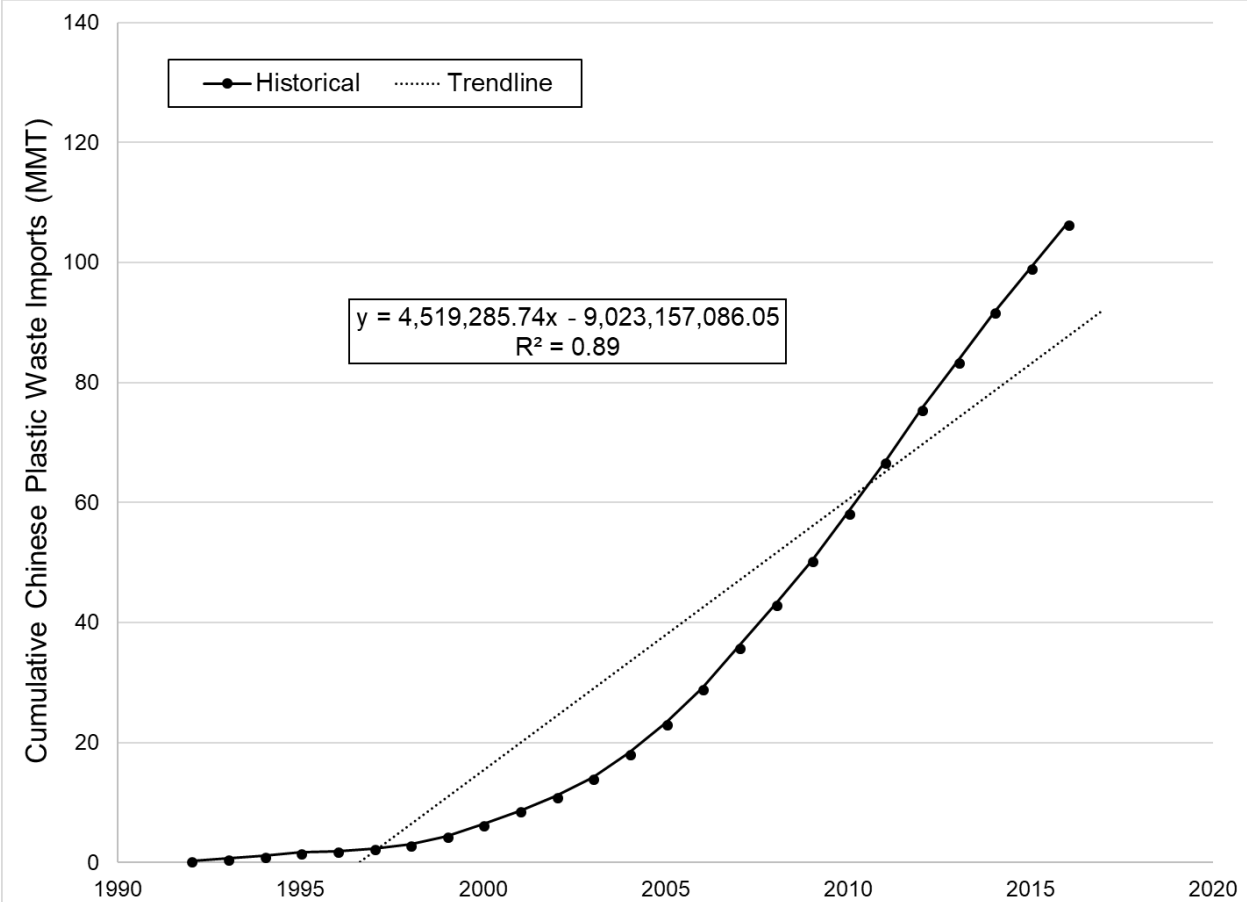

**fig. S1. Linear fit of all historical cumulative Chinese imports of plastic waste ( $R^2 = 0.89$ ) (9–12).**

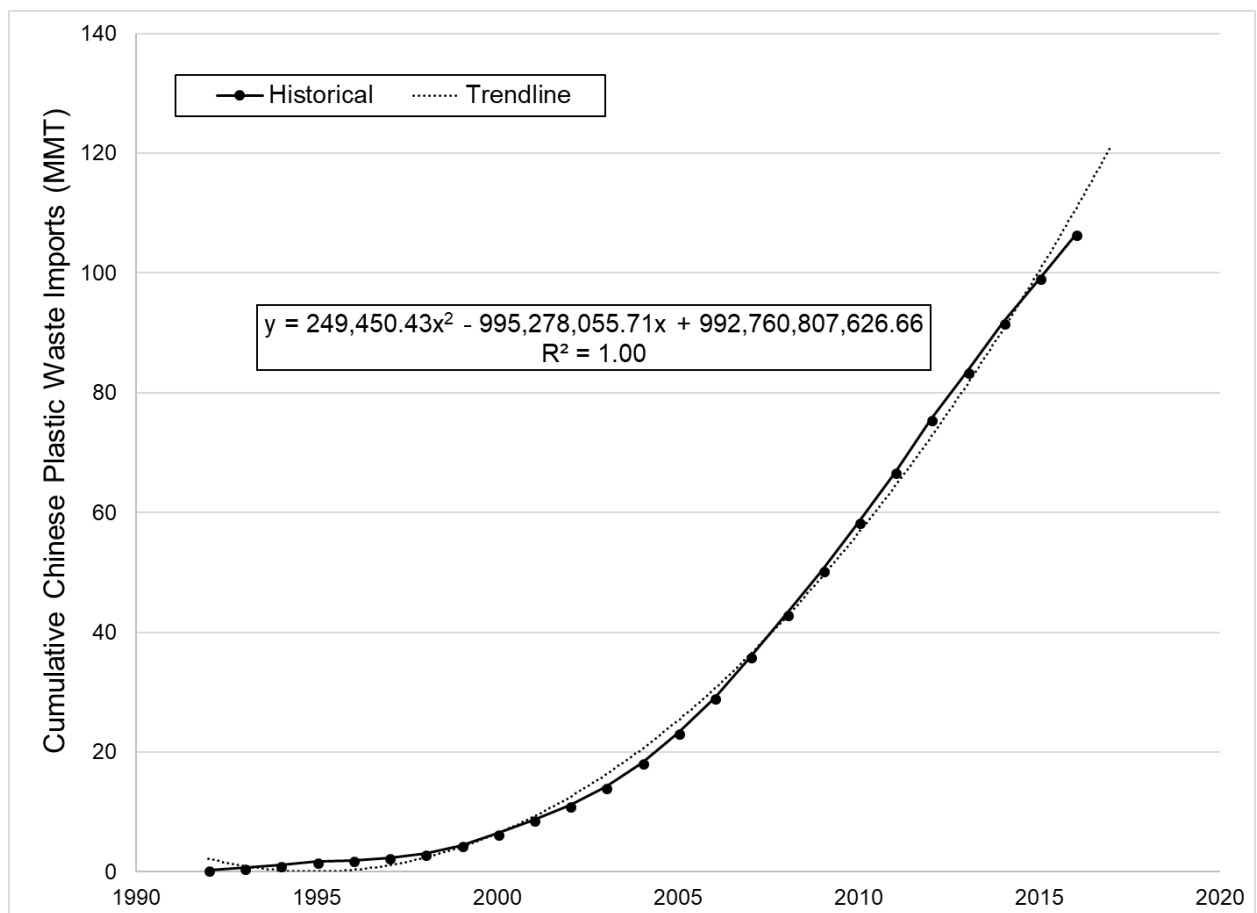

**fig. S2. Polynomial fit for historical cumulative Chinese imports of plastic waste ( $R^2 = 1.0$ ) (9–12).**

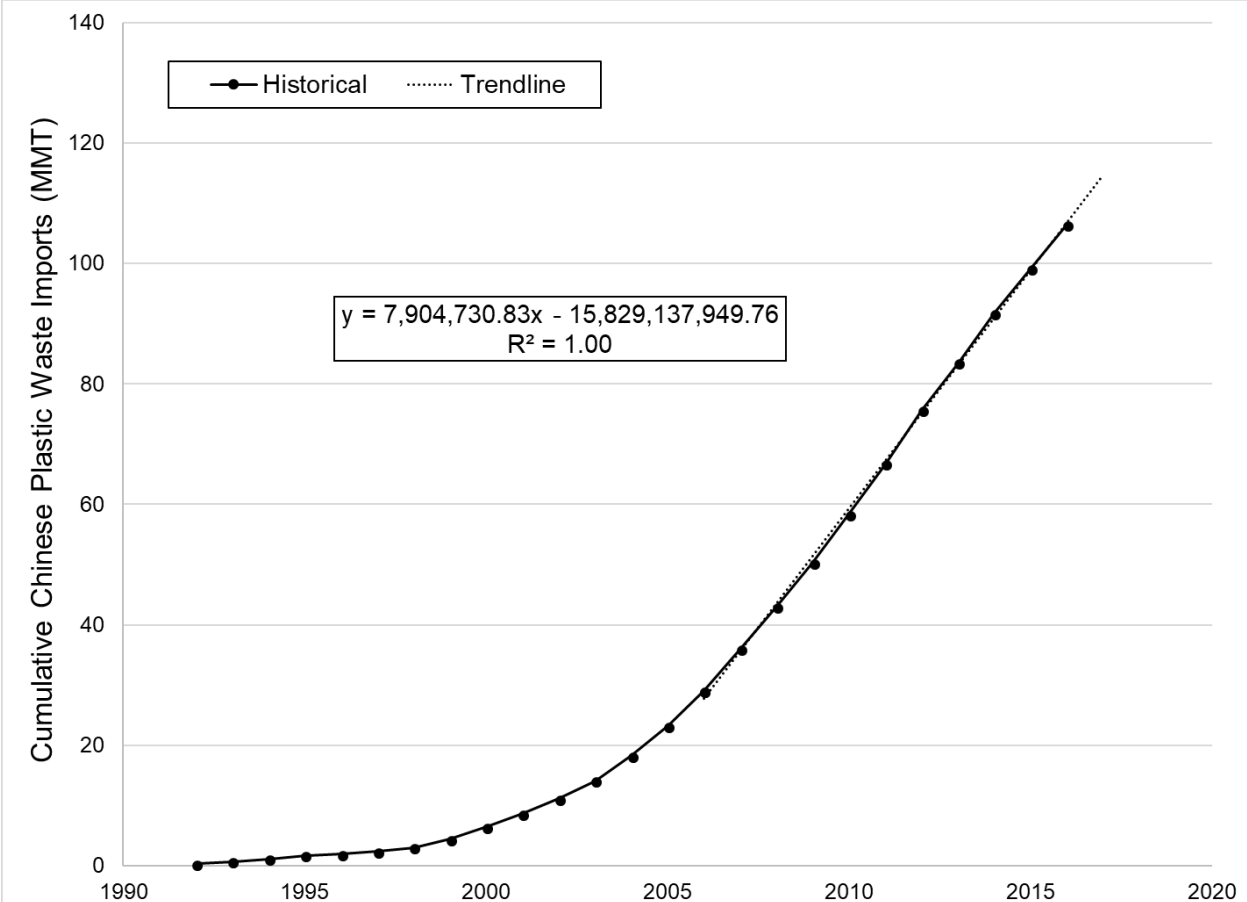

fig. S3. Linear fit for last 10 years of cumulative Chinese imports of plastic waste ( $R^2 = 1.0$ ) (9–12).

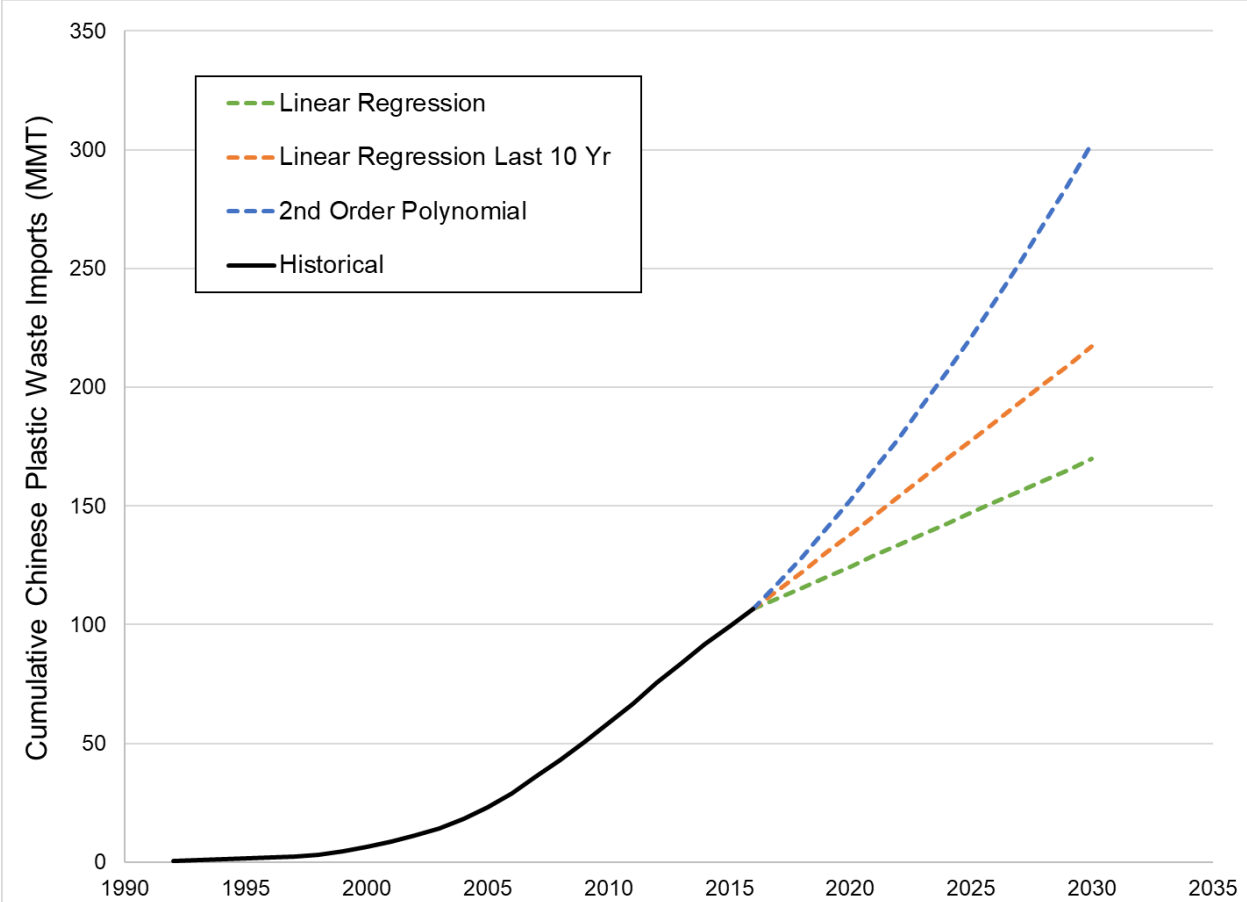

fig. S4. Best-fit regression analysis for future plastic waste imports (9–12).

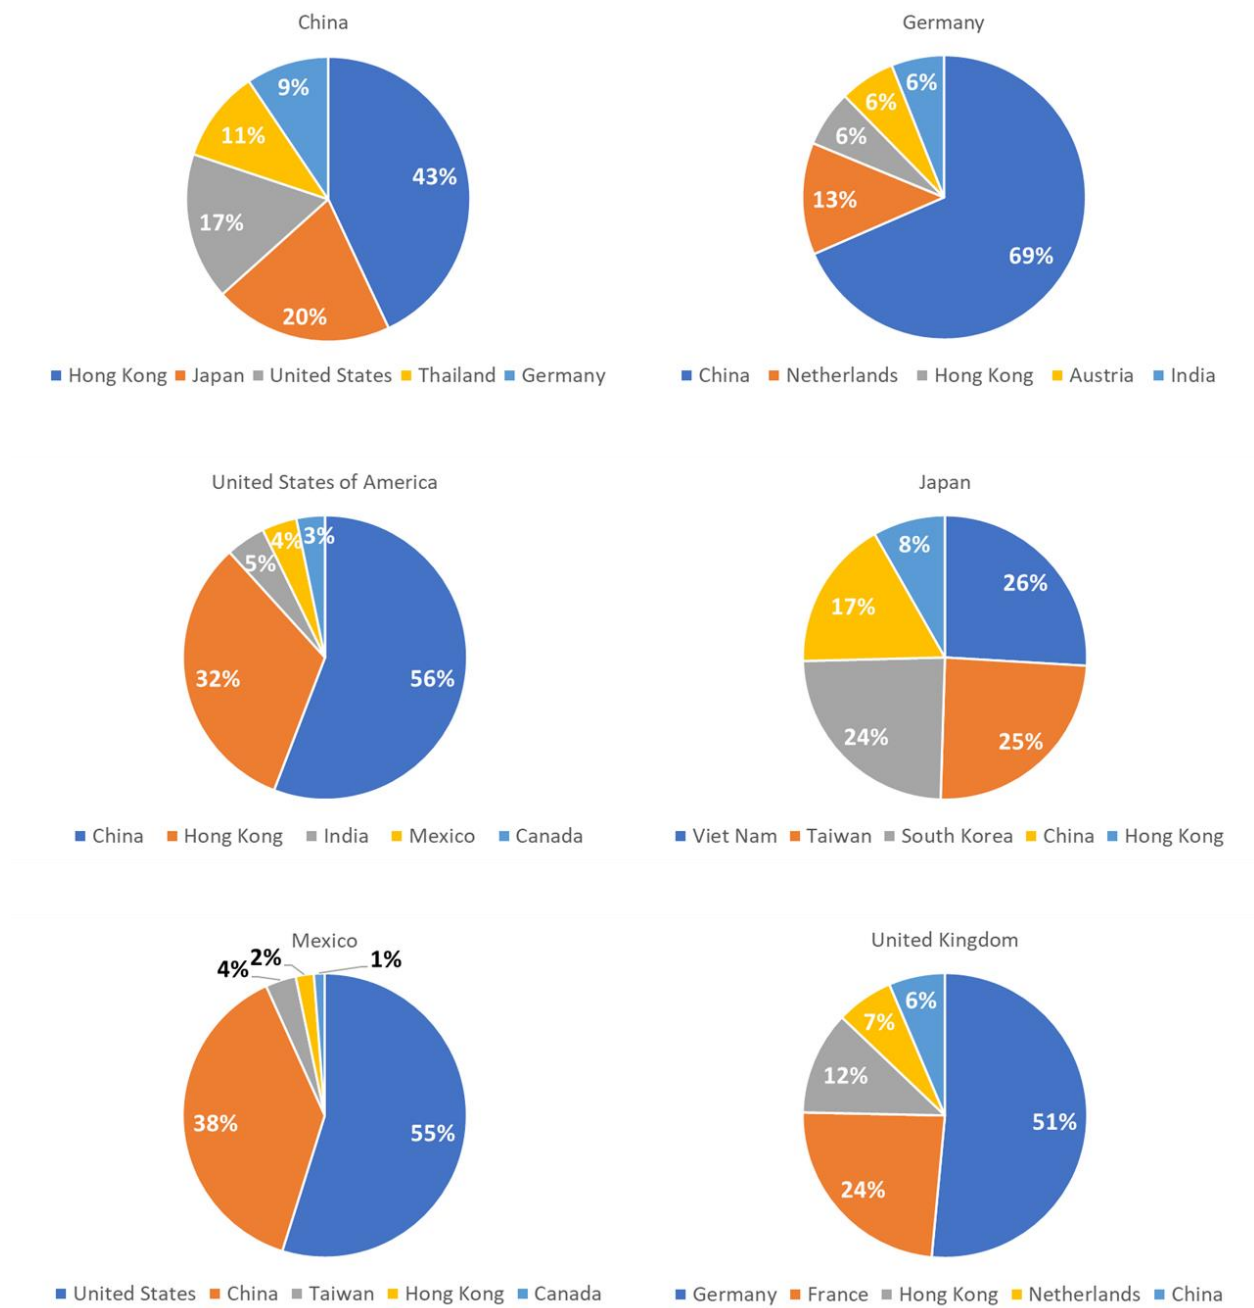

**fig. S5. Top five importers to China in 2016 and top five export destinations for the top five historical exporters (13, 24–26).** Chinese imports include PE, PS, PVC, PP and PET. Exports of top 5 historical exporters include PE, PS, PVC.



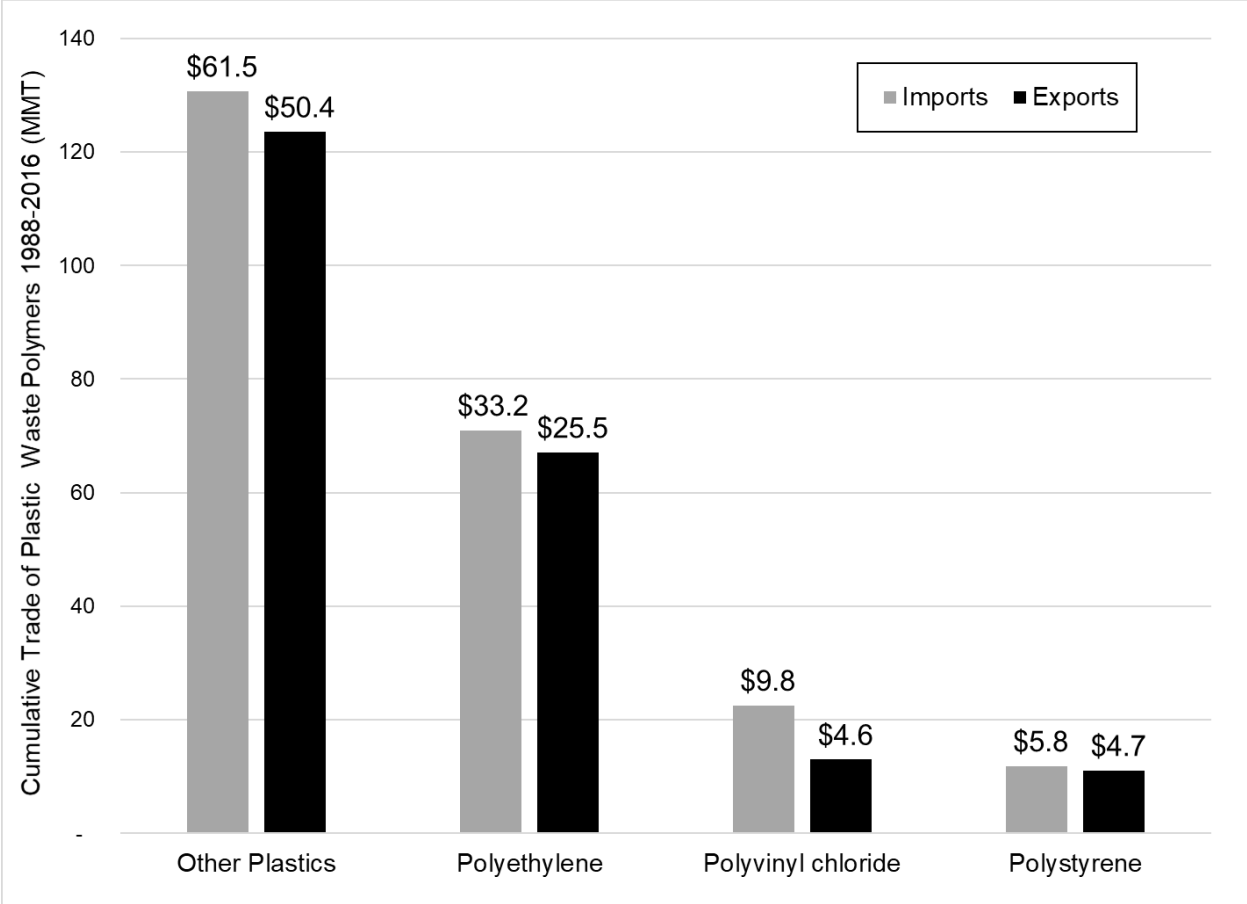

**fig. S6. Comparison of cumulative import and export quantities of plastic waste (MT) from 1988 to 2016 for each plastic waste polymer. Dollar values in billion USD. (9-12)**

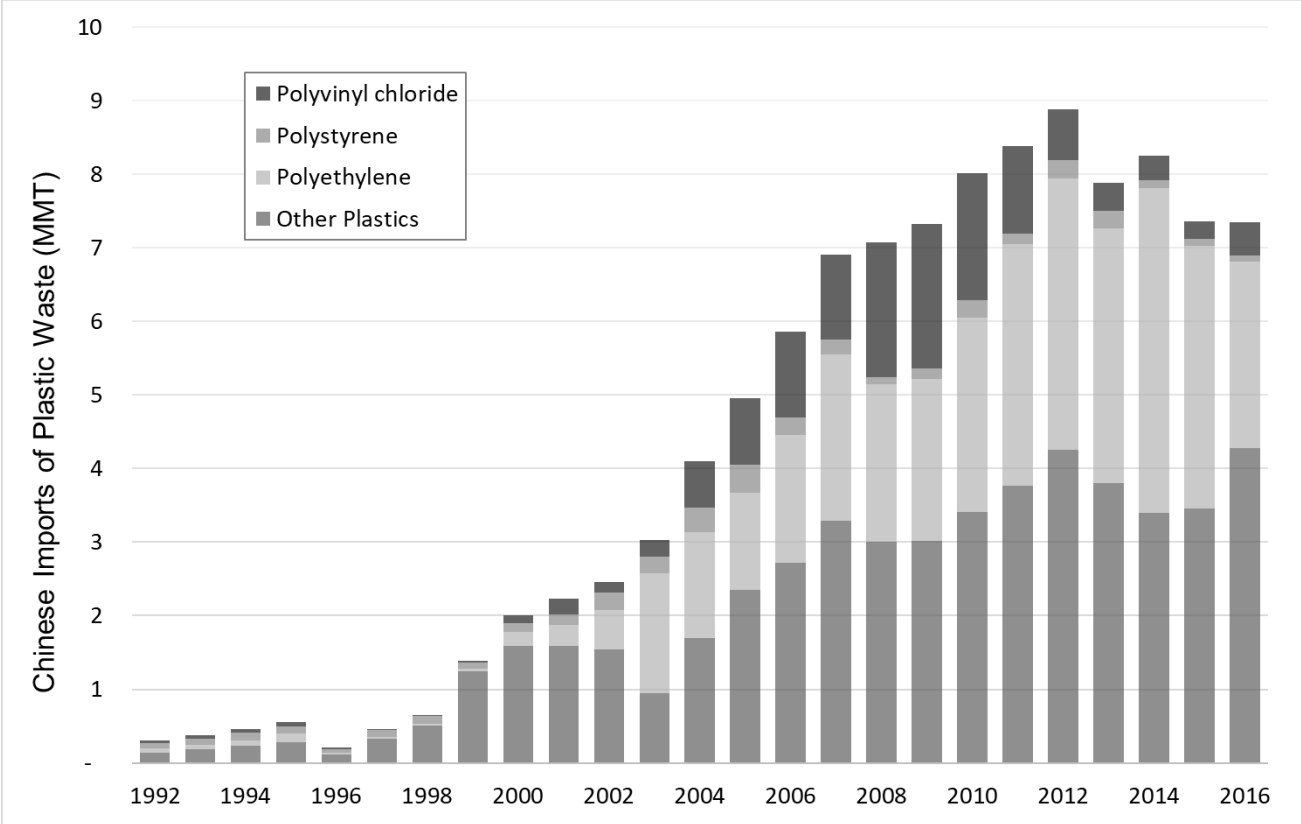

fig. S7. Annual Chinese imports of each plastic waste polymer from 1992 to 2016. (9-12)

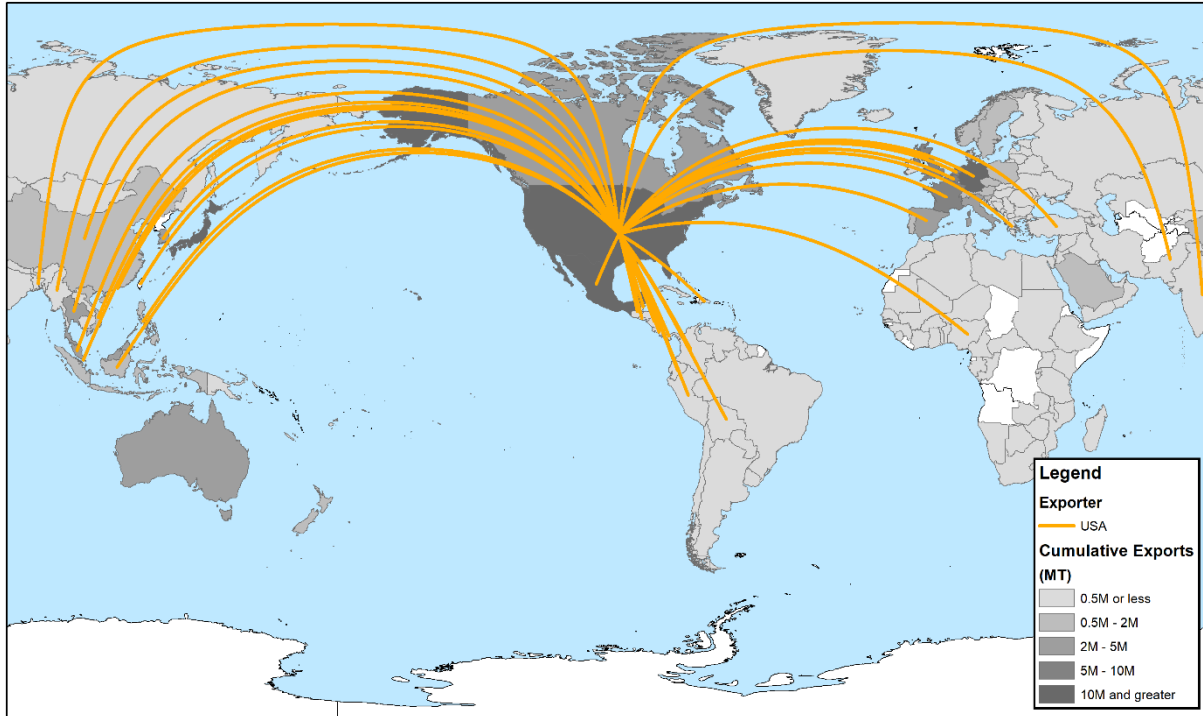

**fig. S8. Destination countries of U.S. exports of plastic waste in 2016 and cumulative plastic waste export tonnage (in million MT) 1988–2016.** Countries with no reported exported plastic waste values are white. Quantities for destination of exports in 2016 include PE, PS, PVC, PP, and PET (28-30). Cumulative exports represent by country exports of PE, PS, PVC, and Other Plastic (9-12).

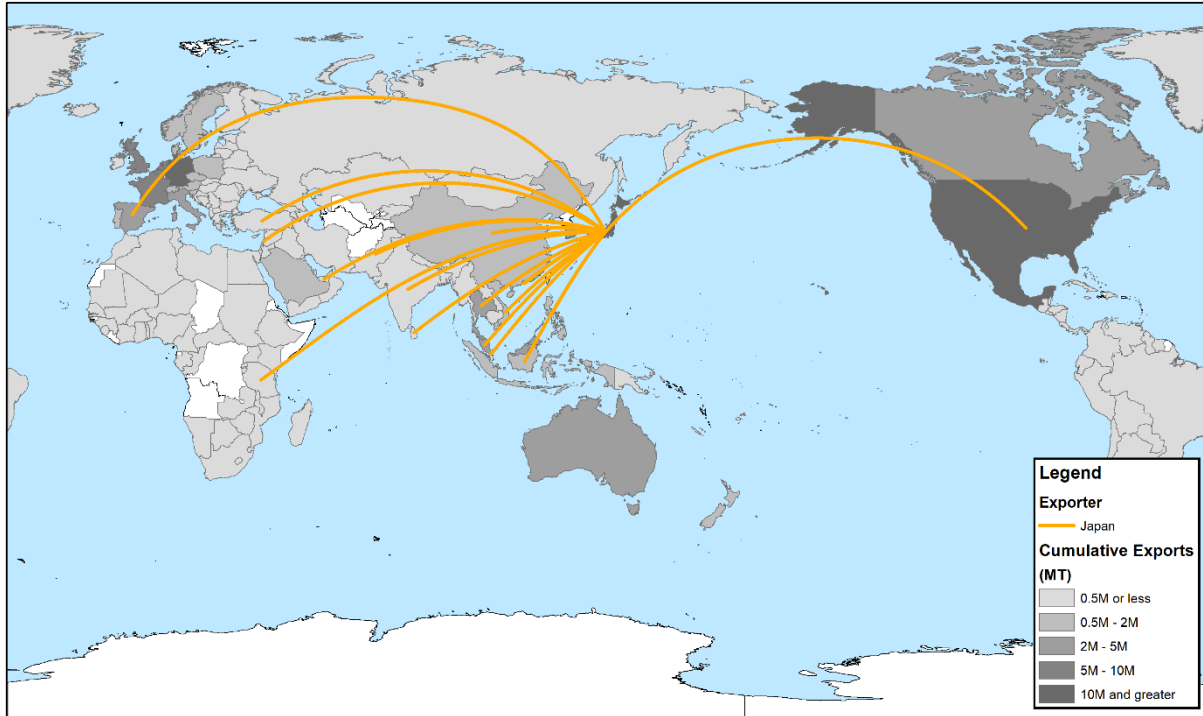

**fig. S9. Destination countries of Japanese exports of plastic waste in 2016 and cumulative plastic waste export tonnage (in million MT) 1988–2016.** Countries with no reported exported plastic waste values are white. Quantities for destination of exports in 2016 include PE, PS, PVC, PP, and PET (28-30). Cumulative exports represent by country exports of PE, PS, PVC, and Other Plastic (9-12).

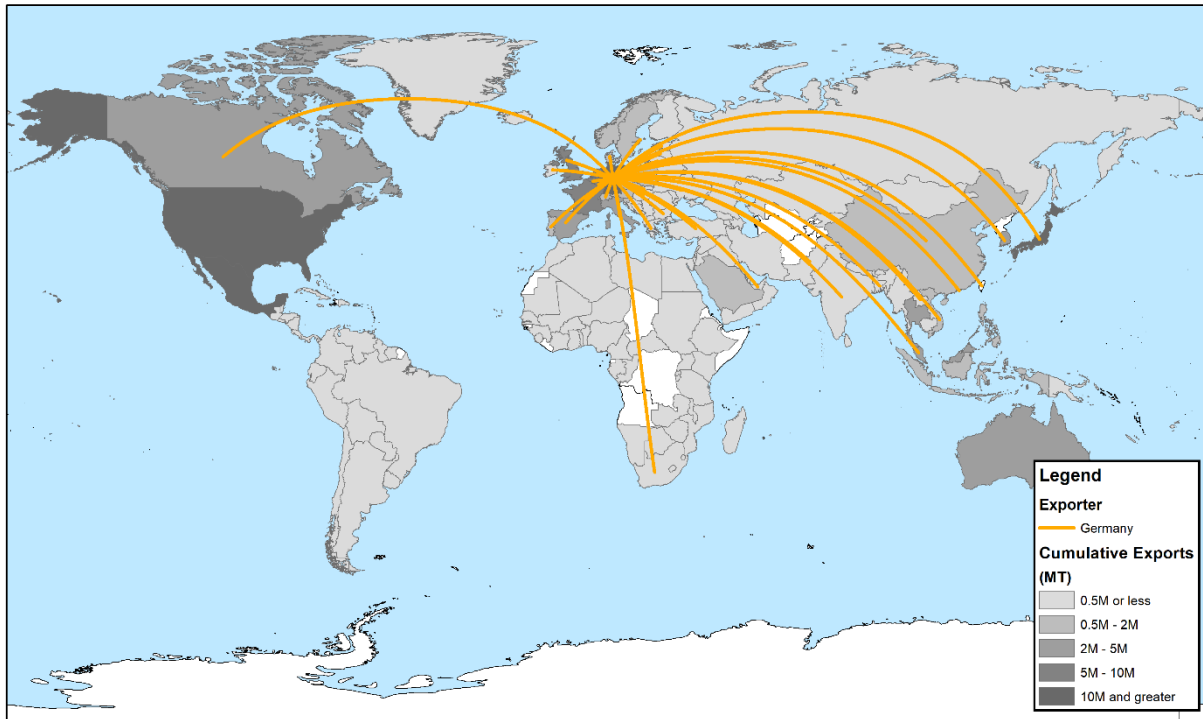

**fig. S10. Destination countries of German exports of plastic waste in 2016 and cumulative plastic waste export tonnage (in million MT) 1988–2016.** Countries with no reported exported plastic waste values are white. Quantities for destination of exports in 2016 include PE, PS, PVC, PP, and PET (28-30). Cumulative exports represent by country exports of PE, PS, PVC, and Other Plastic (9-12).

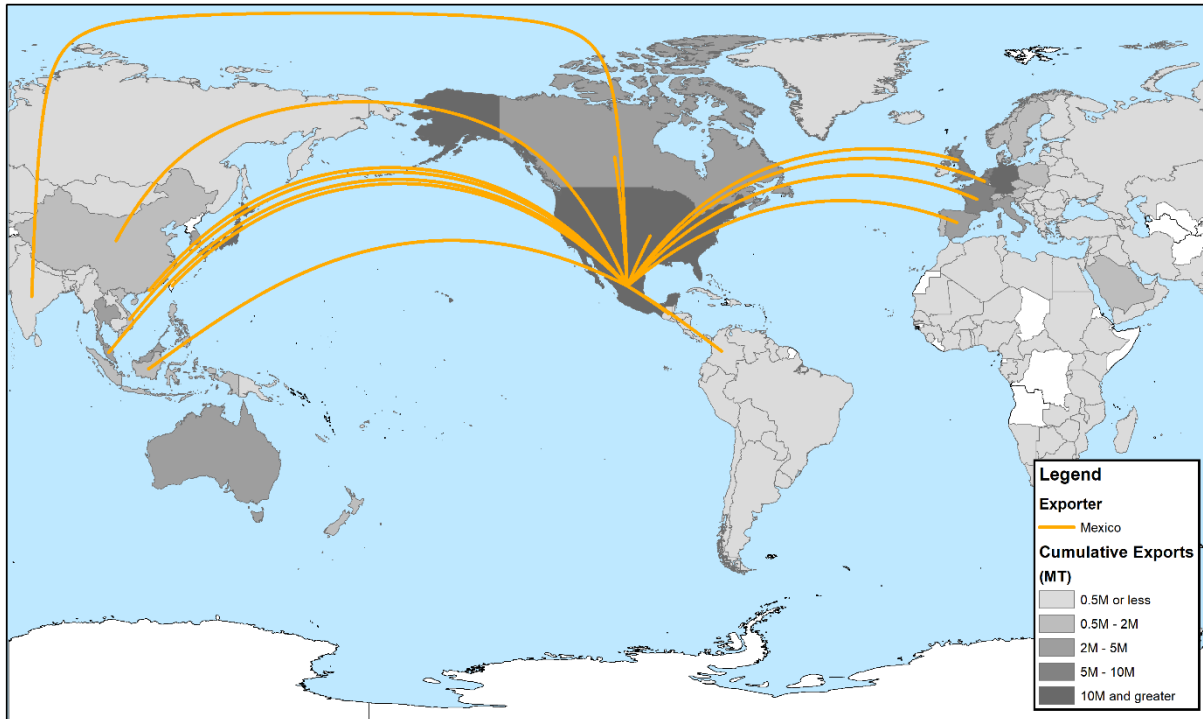

**fig. S11. Destination countries of Mexican exports of plastic waste in 2016 and cumulative plastic waste export tonnage (in million MT) 1988–2016.** Countries with no reported exported plastic waste values are white. Quantities for destination of exports in 2016 include PE, PS, PVC, PP, and PET (28-30). Cumulative exports represent by country exports of PE, PS, PVC, and Other Plastic (9-12).

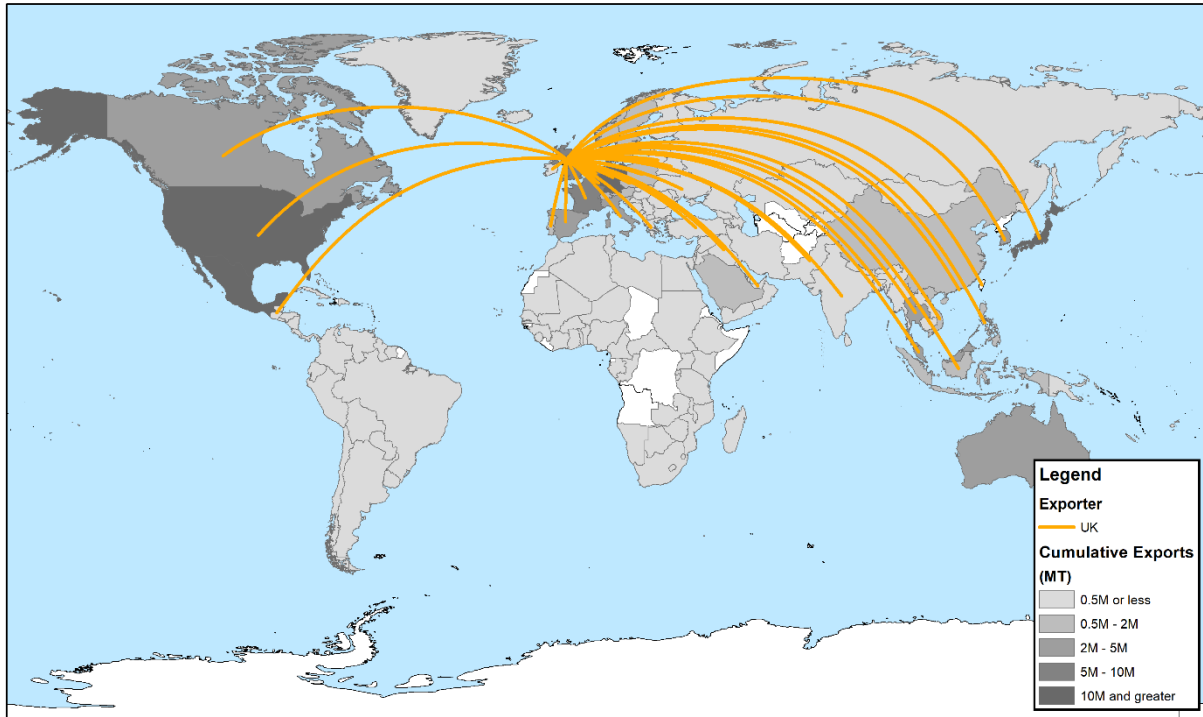

**fig. S12. Destination countries of UK exports of plastic waste in 2016 and cumulative plastic waste export tonnage (in million MT) 1988–2016.** Countries with no reported exported plastic waste values are white. Quantities for destination of exports in 2016 include PE, PS, PVC, PP, and PET (28-30). Cumulative exports represent by country exports of PE, PS, PVC, and Other Plastic (9-12).

**table S1. Ranking of World Bank economic groups based on cumulative exports and imports plastic waste (in MT) from 1988 to 2016 (9–12).**

| <b>Cumulative Exports by Income Level</b> |                 |                                      |                              |                   |
|-------------------------------------------|-----------------|--------------------------------------|------------------------------|-------------------|
| <b>Rank</b>                               | <b>Reporter</b> | <b>Trade Value<br/>(billion USD)</b> | <b>Mass<br/>(million MT)</b> | <b>% of Total</b> |
| <b>1</b>                                  | HIC             | 70.9                                 | 186                          | 87                |
| <b>2</b>                                  | UMI             | 9.56                                 | 19.7                         | 9.2               |
| <b>3</b>                                  | LMI             | 3.46                                 | 6.12                         | 2.8               |
| <b>4</b>                                  | Unspecified     | 1.15                                 | 2.63                         | 1.2               |
| <b>5</b>                                  | LI              | 0.09                                 | 0.20                         | 0.1               |
| <b>Total</b>                              |                 | <b>85.2</b>                          | <b>215</b>                   | <b>100</b>        |

| <b>Cumulative Imports by Income Level</b> |                 |                                      |                              |                   |
|-------------------------------------------|-----------------|--------------------------------------|------------------------------|-------------------|
| <b>Rank</b>                               | <b>Reporter</b> | <b>Trade Value<br/>(billion USD)</b> | <b>Mass<br/>(million MT)</b> | <b>% of Total</b> |
| <b>1</b>                                  | HIC             | 46.6                                 | 115                          | 49                |
| <b>2</b>                                  | UMI             | 59.7                                 | 112                          | 47                |
| <b>3</b>                                  | LMI             | 2.84                                 | 6.19                         | 2.6               |
| <b>4</b>                                  | Unspecified     | 0.98                                 | 2.41                         | 1.0               |
| <b>5</b>                                  | LI              | 0.07                                 | 0.09                         | 0.0               |
| <b>Total</b>                              |                 | <b>110</b>                           | <b>236</b>                   | <b>100</b>        |

\* HIC = High Income; UMI = Upper Middle Income; LMI = Lower Middle Income; LI = Low Income.

Based on 2015 Gross National Income.

\* N/A refers to unclassified countries or regions

\* Source: UN Comtrade



**table S2. Ranking of World Bank regional groups based on cumulative exports and imports of plastic waste (MT) from 1988 to 2016 (9–12).**

| <b>Cumulative Exports by Region</b> |               |                                      |                       |                       |
|-------------------------------------|---------------|--------------------------------------|-----------------------|-----------------------|
| <b>Rank</b>                         | <b>Region</b> | <b>Trade Value<br/>(billion USD)</b> | <b>Mass<br/>(MMT)</b> | <b>% of<br/>Total</b> |
| 1 <sup>2</sup>                      | EAP           | 34.8                                 | 95.8                  | 44                    |
| 2                                   | ECA           | 27.6                                 | 69.3                  | 32                    |
| 3                                   | NA            | 14.3                                 | 30.6                  | 14                    |
| 4                                   | LAC           | 5.52                                 | 12.6                  | 5.9                   |
| 5                                   | Unspecified   | 1.15                                 | 2.63                  | 1.2                   |
| 6                                   | MENA          | 1.03                                 | 2.48                  | 1.2                   |
| 7                                   | SAR           | 0.63                                 | 0.81                  | 0.4                   |
| 8                                   | AFR           | 0.19                                 | 0.45                  | 0.2                   |
| <b>Total</b>                        |               | <b>85.2</b>                          | <b>215</b>            | <b>100</b>            |

| <b>Cumulative Imports by Region</b> |               |                                      |                       |                       |
|-------------------------------------|---------------|--------------------------------------|-----------------------|-----------------------|
| <b>Rank</b>                         | <b>Region</b> | <b>Trade Value<br/>(billion USD)</b> | <b>Mass<br/>(MMT)</b> | <b>% of<br/>Total</b> |
| 1                                   | EAP           | 83.3                                 | 177                   | 75                    |
| 2                                   | ECA           | 15.7                                 | 37.9                  | 16                    |
| 3                                   | NA            | 6.94                                 | 12.3                  | 5.2                   |
| 4                                   | SAR           | 1.43                                 | 3.7                   | 1.6                   |
| 5                                   | Unspecified   | 0.98                                 | 2.4                   | 1.0                   |
| 6                                   | LAC           | 1.02                                 | 2.0                   | 0.8                   |
| 7                                   | MENA          | 0.54                                 | 0.8                   | 0.3                   |
| 8                                   | AFR           | 0.38                                 | 0.4                   | 0.2                   |
| <b>Total</b>                        |               | <b>110</b>                           | <b>236</b>            | <b>100</b>            |

<sup>1</sup>AFR = Africa; EAP = East Asia & Pacific; ECA = Eastern & Central Asia; LAC = Latin American & the Caribbean; MENA = Middle East & North Africa; NA = North America; SAR = South Asia

<sup>2</sup>If taken collectively, countries within the World Bank Organization for Economic Co-operation and Development (OECD) countries would contribute the most to exports at 64%.

<sup>3</sup>Unspecified regions refer to nations or regions within the UN Comtrade trade data that are not classified by the World Bank

\* Source: UN Comtrade

**table S3. Ranking of countries based on cumulative exports and imports of each plastic waste polymer classification from 1988 to 2016 (9–12).**

| Top 10 Exporters |                |                              |                |                              |                |                              |                 |                              |
|------------------|----------------|------------------------------|----------------|------------------------------|----------------|------------------------------|-----------------|------------------------------|
| Ranking          | Other Plastics |                              | PE             |                              | PS             |                              | PVC             |                              |
|                  | Reporter       | Cummulative Net Weight (MMT) | Reporter       | Cummulative Net Weight (MMT) | Reporter       | Cummulative Net Weight (MMT) | Reporter        | Cummulative Net Weight (MMT) |
| 1                | Hong Kong SAR  | 34.4                         | Hong Kong SAR  | 13.6                         | Hong Kong SAR  | 3.78                         | Hong Kong SAR   | 4.35                         |
| 2                | United States  | 15.1                         | Germany        | 12.3                         | Japan          | 3.29                         | United States   | 2.49                         |
| 3                | Japan          | 12.6                         | United States  | 8.38                         | United States  | 0.76                         | Japan           | 1.29                         |
| 4                | Mexico         | 9.06                         | United Kingdom | 5.75                         | Germany        | 0.65                         | Germany         | 0.84                         |
| 5                | Netherlands    | 4.34                         | Japan          | 5.05                         | United Kingdom | 0.43                         | France          | 0.55                         |
| 6                | Germany        | 3.88                         | Belgium        | 3.55                         | France         | 0.36                         | United Kingdom  | 0.49                         |
| 7                | France         | 3.59                         | France         | 3.05                         | Mexico         | 0.30                         | Mexico          | 0.37                         |
| 8                | Canada         | 2.87                         | Netherlands    | 3.01                         | Belgium        | 0.14                         | Singapore       | 0.26                         |
| 9                | Thailand       | 2.79                         | South Korea    | 0.88                         | Philippines    | 0.13                         | Netherlands     | 0.25                         |
| 10               | Belgium        | 2.59                         | Mexico         | 0.79                         | Netherlands    | 0.12                         | Canada          | 0.24                         |
|                  | <b>Total</b>   | <b>91.2</b>                  | <b>Total</b>   | <b>56.4</b>                  | <b>Total</b>   | <b>9.96</b>                  | <b>Total</b>    | <b>11.1</b>                  |
| Top 10 Importers |                |                              |                |                              |                |                              |                 |                              |
| Ranking          | Other Plastics |                              | PE             |                              | PS             |                              | PVC             |                              |
|                  | Reporter       | Cummulative Net Weight (MMT) | Reporter       | Cummulative Net Weight (MMT) | Reporter       | Cummulative Net Weight (MMT) | Reporter        | Cummulative Net Weight (MMT) |
| 1                | China          | 51.1                         | China          | 37.7                         | Hong Kong SAR  | 6.04                         | China           | 13.6                         |
| 2                | Hong Kong SAR  | 41.3                         | Hong Kong SAR  | 14.0                         | China          | 3.97                         | Hong Kong SAR   | 3.14                         |
| 3                | United States  | 7.13                         | Netherlands    | 3.26                         | Germany        | 0.32                         | Germany         | 0.69                         |
| 4                | Netherlands    | 2.84                         | Belgium        | 2.37                         | Italy          | 0.21                         | Other Asia, nes | 0.54                         |
| 5                | India          | 2.66                         | Germany        | 2.26                         | United States  | 0.16                         | Canada          | 0.38                         |
| 6                | Germany        | 2.09                         | Canada         | 1.24                         | France         | 0.15                         | Pakistan        | 0.35                         |
| 7                | Italy          | 2.08                         | Malaysia       | 1.05                         | Canada         | 0.14                         | United States   | 0.32                         |
| 8                | Canada         | 2.07                         | Italy          | 0.89                         | Netherlands    | 0.11                         | South Korea     | 0.32                         |
| 9                | Sweden         | 1.65                         | United States  | 0.89                         | Spain          | 0.09                         | India           | 0.28                         |
| 10               | Belgium        | 1.60                         | Austria        | 0.68                         | Austria        | 0.09                         | Mexico          | 0.27                         |
|                  | <b>Total</b>   | <b>115</b>                   | <b>Total</b>   | <b>64.4</b>                  | <b>Total</b>   | <b>11.3</b>                  | <b>Total</b>    | <b>19.9</b>                  |

**table S4. Estimated percentage of imported plastic waste to be managed in China from 2010 to 2016 (4, 9–12, 14).**

| Year | Population <sup>1</sup> | Waste Generation Rate (kg/person/day) <sup>2</sup> | % Plastic in Waste Stream <sup>2</sup> | Plastic Waste Generated (MT) | Imported Recycled Waste (MT) <sup>3</sup> | Total Waste to Manage (MT) | % of Plastic Waste that is Imported |
|------|-------------------------|----------------------------------------------------|----------------------------------------|------------------------------|-------------------------------------------|----------------------------|-------------------------------------|
| 2010 | 1,338,000,000           | 1.1                                                | 11.0                                   | 59,092,770                   | 8,009,674                                 | 67,102,444                 | 11.9%                               |
| 2011 | 1,344,000,000           | 1.1                                                | 11.0                                   | 59,357,760                   | 8,384,190                                 | 67,741,950                 | 12.4%                               |
| 2012 | 1,351,000,000           | 1.1                                                | 11.0                                   | 59,666,915                   | 8,877,767                                 | 68,544,682                 | 13.0%                               |
| 2013 | 1,357,000,000           | 1.1                                                | 11.0                                   | 59,931,905                   | 7,881,304                                 | 67,813,209                 | 11.6%                               |
| 2014 | 1,364,000,000           | 1.1                                                | 11.0                                   | 60,241,060                   | 8,254,247                                 | 68,495,307                 | 12.1%                               |
| 2015 | 1,371,000,000           | 1.1                                                | 11.0                                   | 60,550,215                   | 7,354,229                                 | 67,904,444                 | 10.8%                               |
| 2016 | 1,379,000,000           | 1.1                                                | 11.0                                   | 60,903,535                   | 7,347,176                                 | 68,250,711                 | 10.8%                               |
|      |                         |                                                    |                                        |                              |                                           | <b>Average:</b>            | <b>11.8%</b>                        |

<sup>1</sup> Population data from World Bank

<sup>2</sup> Waste Generation Rate from Jambeck, et al. 2015

<sup>3</sup> UN Comtrade Data for PE, PS, PVC, and Other plastics

**table S5. Projected displaced plastic waste based on 100, 75, and 50% restriction scenarios for Chinese imports of plastic waste after the implementation of the new Chinese import ban policy.**

| Year | Projected Chinese Imports (MT) | Displaced Plastic Waste - 100% Ban (MT) | Displaced Plastic Waste - 75% Ban (MT) | Displaced Plastic Waste - 50% Ban (MT) |
|------|--------------------------------|-----------------------------------------|----------------------------------------|----------------------------------------|
| 2018 | 122,278,670                    | 15,809,461                              | 11,857,096                             | 7,904,731                              |
| 2020 | 138,088,132                    | 31,618,923                              | 23,714,192                             | 15,809,461                             |
| 2025 | 177,611,786                    | 71,142,577                              | 53,356,933                             | 35,571,289                             |
| 2030 | 217,135,440                    | 110,666,231                             | 82,999,673                             | 55,333,116                             |

**table S6. Ranking of top countries that exported plastic waste to China in 2016 (MT) (13).**

| Ranking             | Reporter      | Income Level | Region     | Imported Plastic Waste (MT) | % of Total Imports |
|---------------------|---------------|--------------|------------|-----------------------------|--------------------|
| 1                   | Hong Kong     | HIC          | EAP        | 1,778,898                   | 24.9%              |
| 2                   | Japan         | HIC          | EAP (OECD) | 842,104                     | 11.8%              |
| 3                   | United States | HIC          | NA (OECD)  | 693,444                     | 9.7%               |
| 4                   | Thailand      | UMI          | EAP        | 431,783                     | 6.1%               |
| 5                   | Germany       | HIC          | ECA (OECD) | 390,106                     | 5.5%               |
| 6                   | Belgium       | HIC          | ECA (OECD) | 323,308                     | 4.5%               |
| 7                   | Philippines   | LMI          | EAP        | 320,105                     | 4.5%               |
| 8                   | Australia     | HIC          | EAP (OECD) | 293,122                     | 4.1%               |
| 9                   | Indonesia     | LMI          | EAP        | 189,273                     | 2.7%               |
| 10                  | Canada        | HIC          | NA (OECD)  | 189,161                     | 2.7%               |
| <b>Top 10 Total</b> |               |              |            | <b>5,451,304</b>            | <b>76.4%</b>       |
| <b>World Total</b>  |               |              |            | <b>7,134,966</b>            |                    |
